# Supplementary material for: Probing the morphological effects of ReOx/CeO2 catalysts on the CO2 hydrogenation reaction
Source: Royal Society of Chemistry journal article supplement (doi:10.1039/d1cy02096j), 2022-01-01
Supplement: d1cy02096j1.pdf [file d1cy02096j1.pdf]

## *Supporting Information*

### **Probing the morphological effects of $\text{ReO}_x/\text{CeO}_2$ catalysts on $\text{CO}_2$ hydrogenation reaction**

Bin Yang <sup>a,b,c</sup>, Yifu Wang <sup>c</sup>, Longtai Li <sup>c</sup>, Biao Gao <sup>c</sup>, Lingxia Zhang <sup>a,b\*</sup> and Limin Guo <sup>c\*</sup>

<sup>a</sup> School of Chemistry and Material Science, Hangzhou Institute for Advanced Study, University of Chinese Academy of Sciences, 1 Sub-lane Xiangshan, Hangzhou 310024, China;

<sup>b</sup> State Key Laboratory of High Performance Ceramics and Superfine Microstructure, Shanghai Institute of Ceramics, Chinese Academy of Sciences, 1295 Dingxi Road, Shanghai 200050, China;

<sup>c</sup> School of Environmental Science and Engineering, Huazhong University of Science and Technology, 1037 Luoyu Road, Wuhan 430074, China;

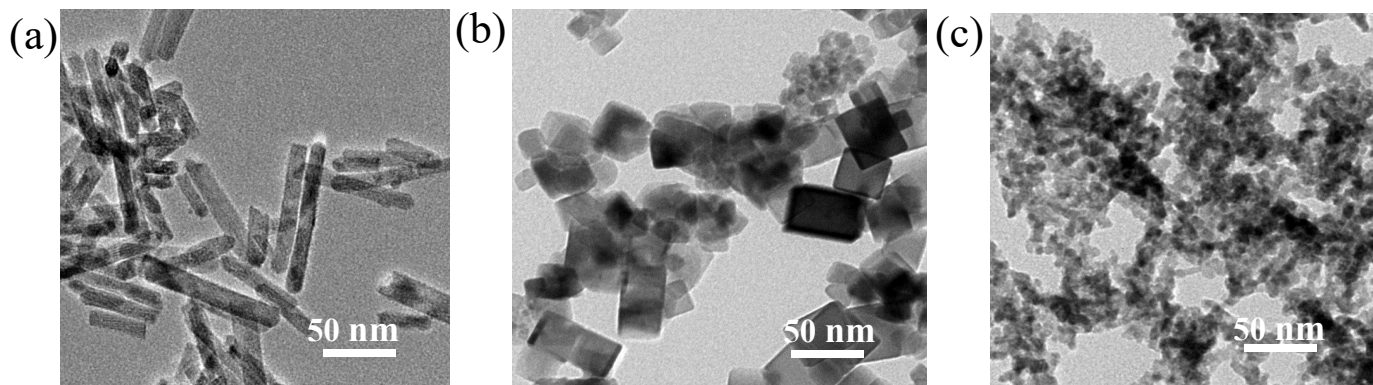

Fig. S1. HRTEM images of (a) CeO<sub>2</sub>-R, (b) CeO<sub>2</sub>-C and (c) CeO<sub>2</sub>-P supports.

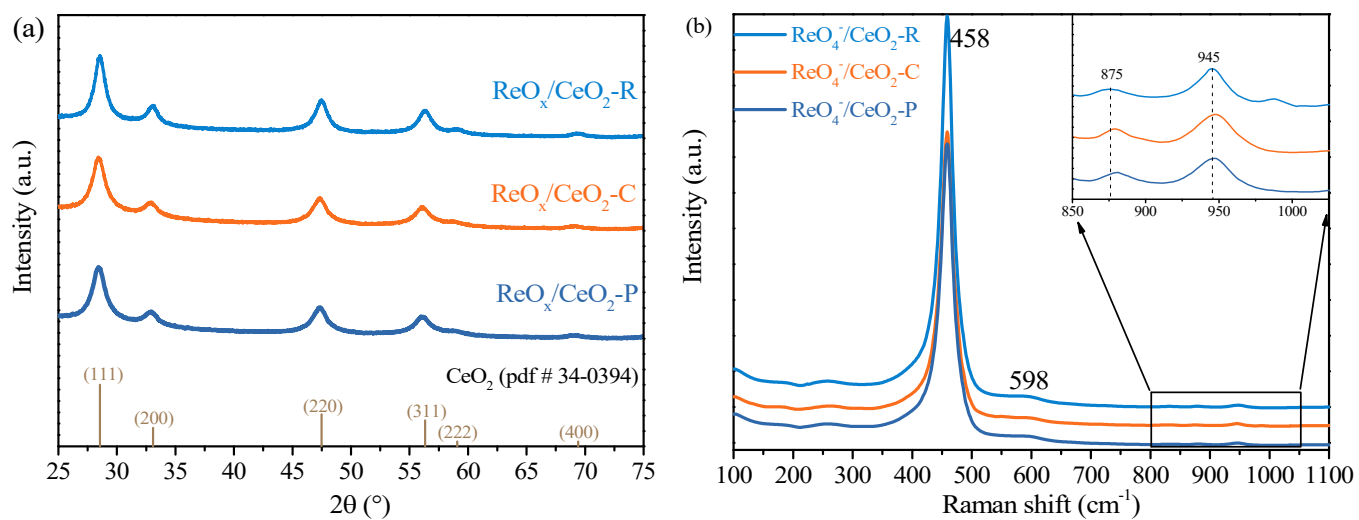

Fig. S2. (a) XRD patterns of ReO<sub>x</sub>/CeO<sub>2</sub>-R, ReO<sub>x</sub>/CeO<sub>2</sub>-C and ReO<sub>x</sub>/CeO<sub>2</sub>-P. (b) Raman spectra of ReO<sub>4</sub><sup>-</sup>/CeO<sub>2</sub>-R, ReO<sub>4</sub><sup>-</sup>/CeO<sub>2</sub>-C and ReO<sub>4</sub><sup>-</sup>/CeO<sub>2</sub>-P.

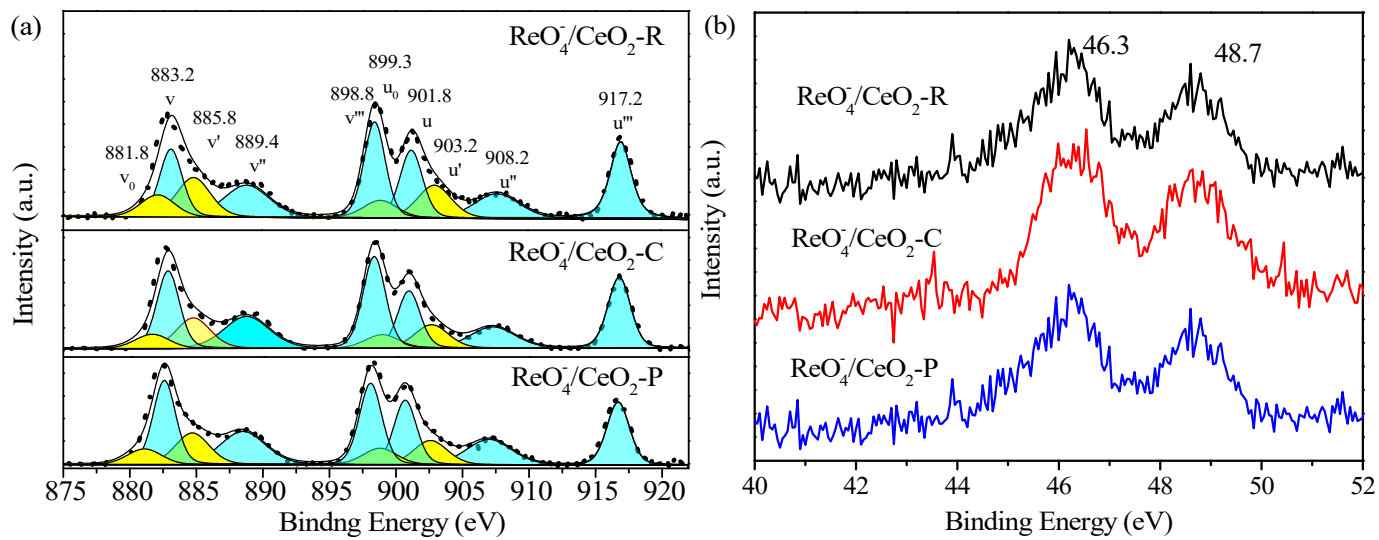

Fig. S3. Deconvolution of XPS spectra of (a) Ce 3d and (b) Re 4f of  $\text{ReO}_4^-/\text{CeO}_2\text{-R}$ ,  $\text{ReO}_4^-/\text{CeO}_2\text{-C}$  and  $\text{ReO}_4^-/\text{CeO}_2\text{-P}$ .

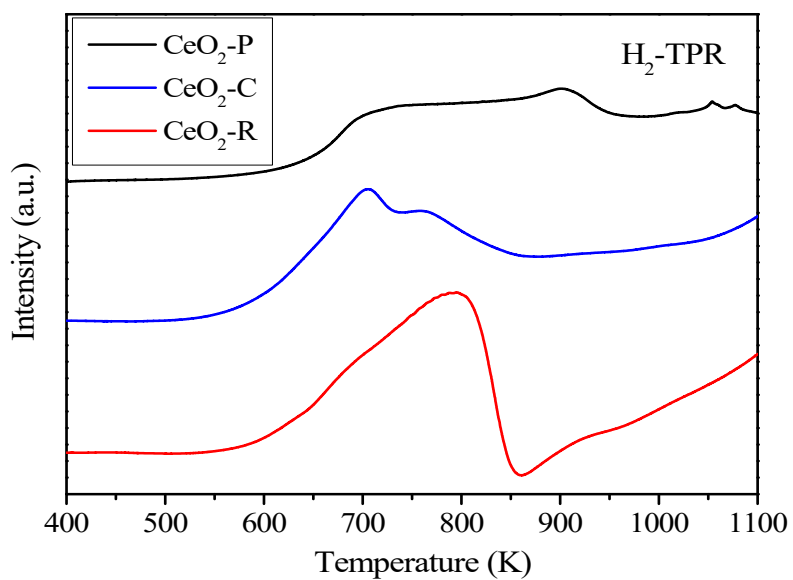

Fig. S4.  $\text{H}_2\text{-TPR}$  of  $\text{CeO}_2\text{-R}$ ,  $\text{CeO}_2\text{-P}$  and  $\text{CeO}_2\text{-C}$ .

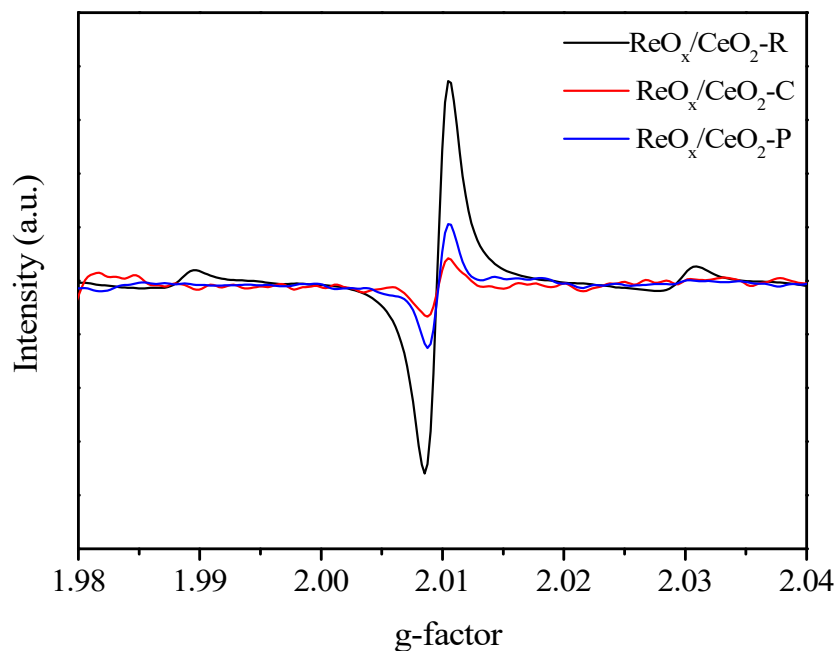

Fig. S5. EPR spectra of the catalysts.

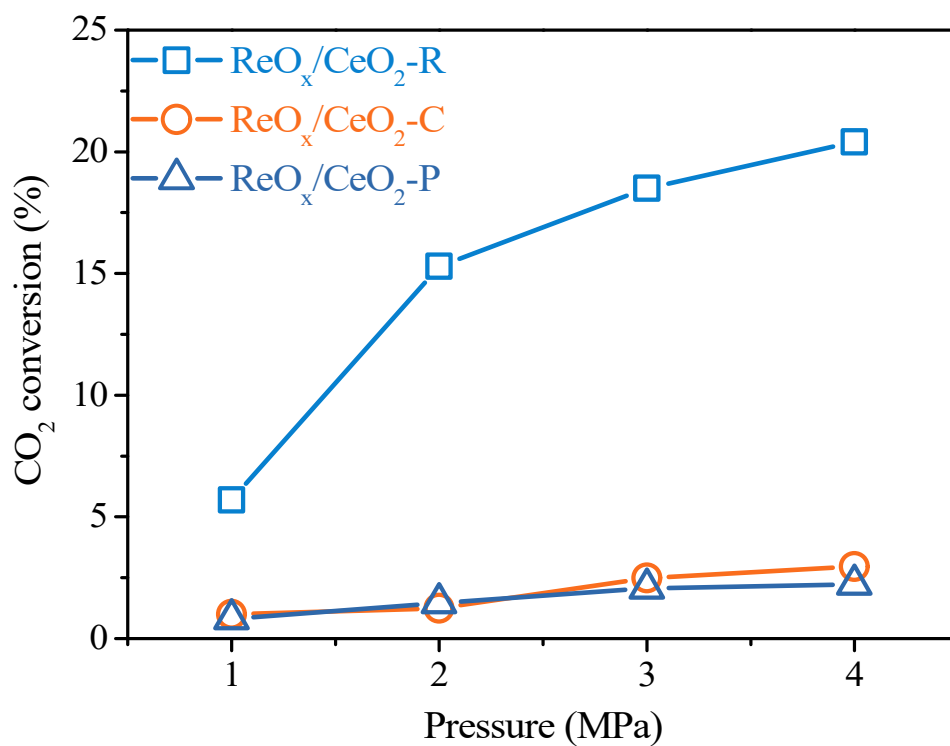

Fig. S6. The effect of pressure on CO<sub>2</sub> conversion on ReO<sub>x</sub>/CeO<sub>2</sub>-R, ReO<sub>x</sub>/CeO<sub>2</sub>-C and ReO<sub>x</sub>/CeO<sub>2</sub>-P at 613 K, CO<sub>2</sub>/H<sub>2</sub>=1/3 and GHSV=12000 mL/g h.

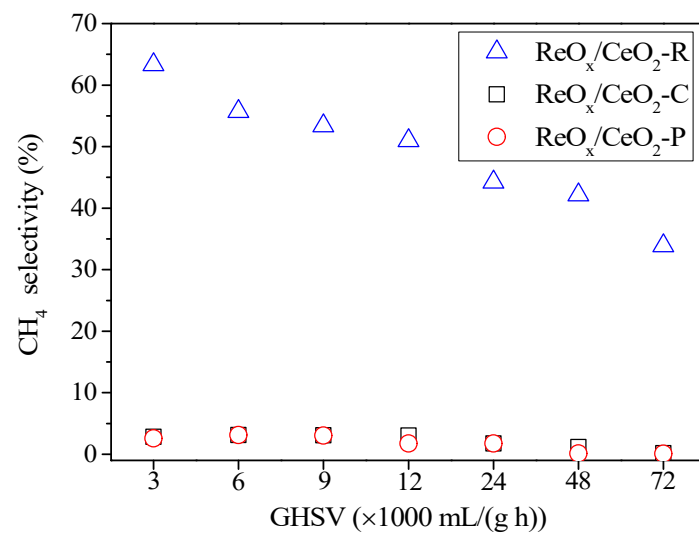

Fig. S7. The effect of GHSV on CH<sub>4</sub> selectivity on ReO<sub>x</sub>/CeO<sub>2</sub>-R, ReO<sub>x</sub>/CeO<sub>2</sub>-C and ReO<sub>x</sub>/CeO<sub>2</sub>-P at 613 K, CO<sub>2</sub>/H<sub>2</sub> = 1/3 and 2 MPa.

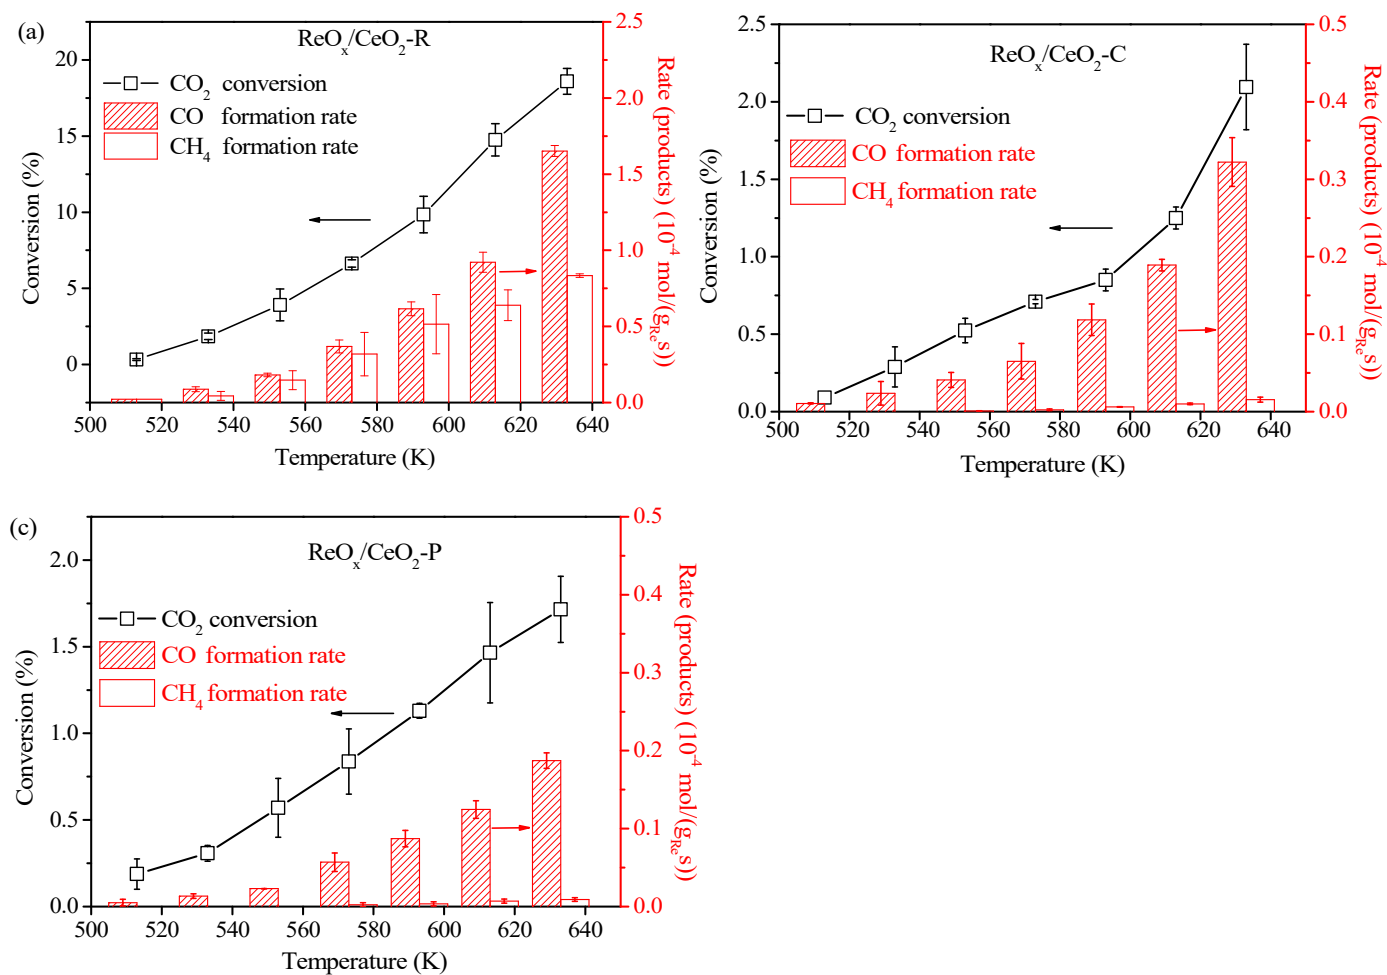

Fig. S8. Temperature-dependent performance of (a) $\text{ReO}_x/\text{CeO}_2\text{-R}$ , (b) $\text{ReO}_x/\text{CeO}_2\text{-C}$  and (c) $\text{ReO}_x/\text{CeO}_2\text{-P}$ . The left vertical axis is  $\text{CO}_2$  conversion and the right is the formation rate of products.

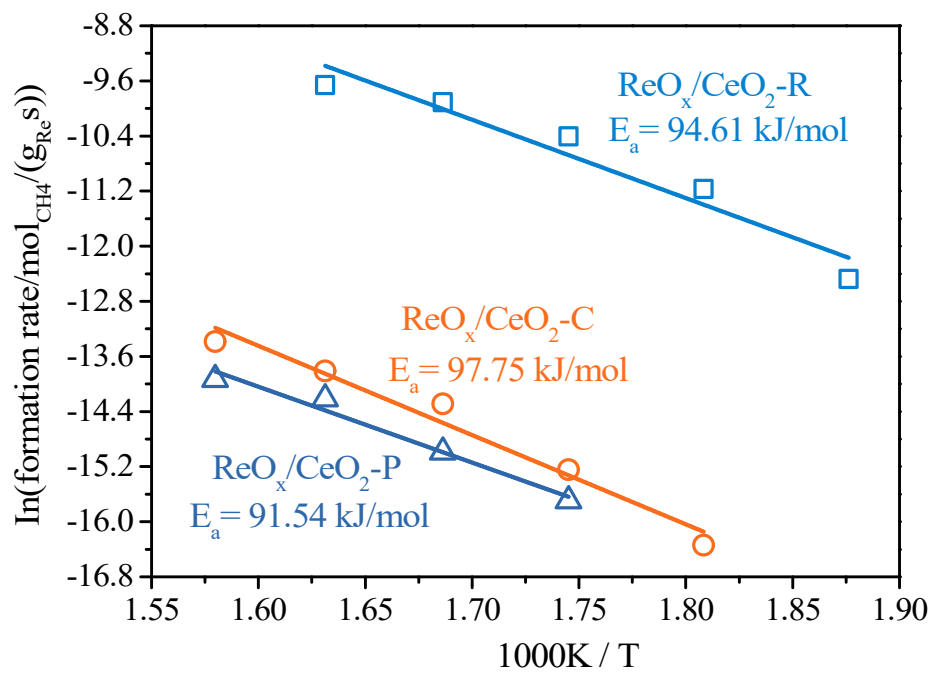

Fig. S9. Arrhenius plots for CH<sub>4</sub> generation on ReO<sub>x</sub>/CeO<sub>2</sub>-R, ReO<sub>x</sub>/CeO<sub>2</sub>-C and ReO<sub>x</sub>/CeO<sub>2</sub>-P.

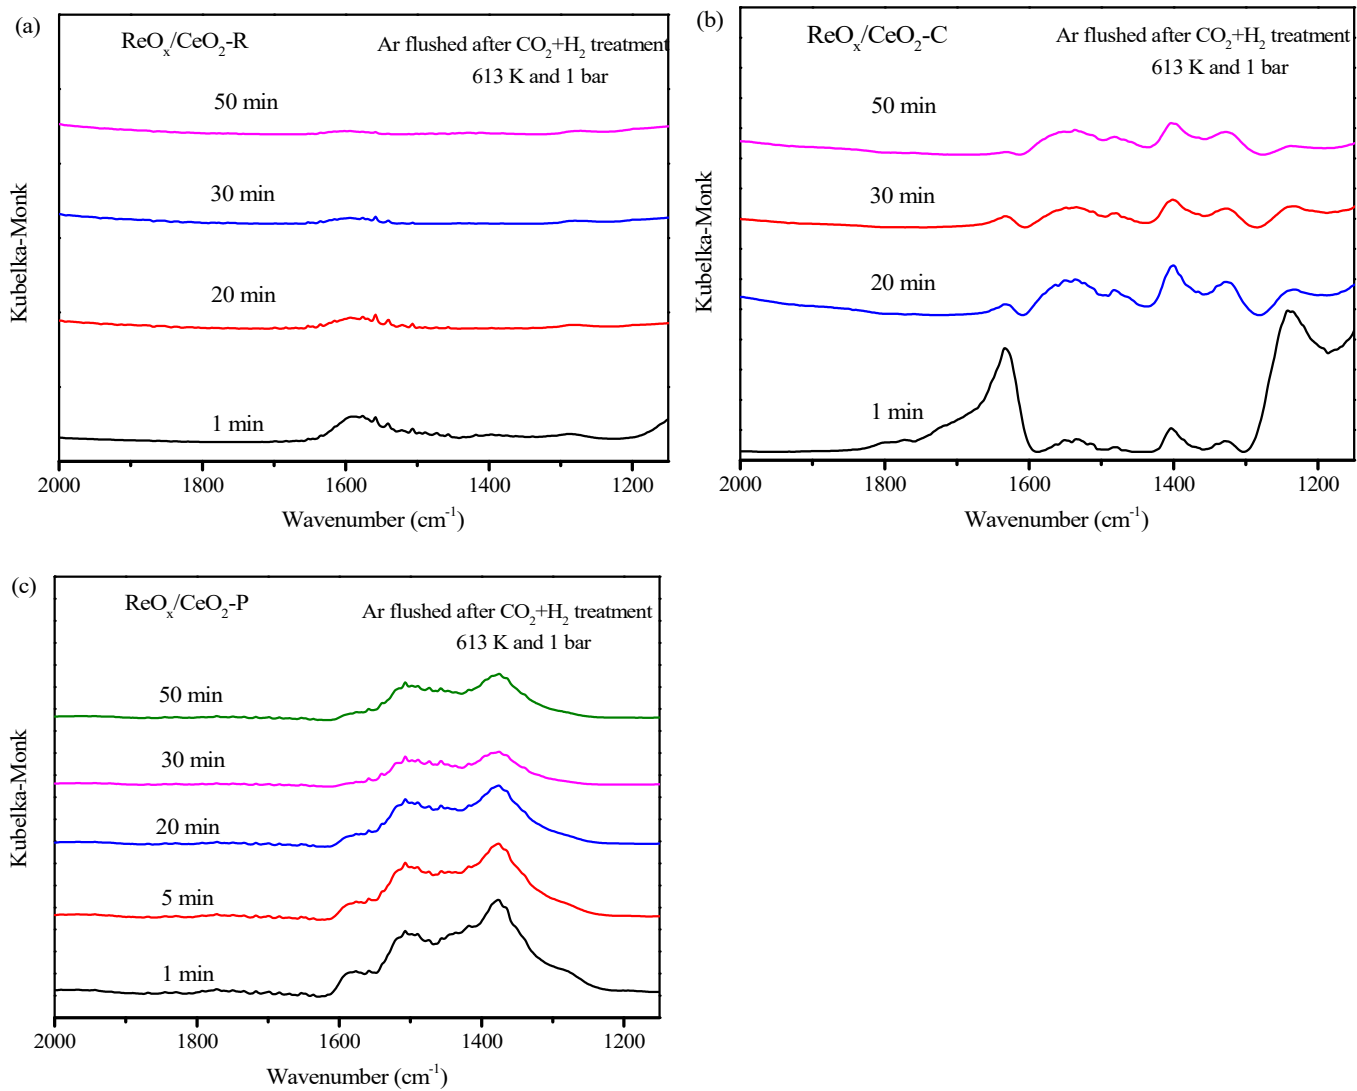

Fig. S10. Infrared spectra recorded under Ar flushing after  $\text{CO}_2+\text{H}_2$  reaction at 613 K and 0.1 MPa. (a)  $\text{ReO}_x/\text{CeO}_2\text{-R}$ , (b)  $\text{ReO}_x/\text{CeO}_2\text{-C}$  and (c)  $\text{ReO}_x/\text{CeO}_2\text{-P}$ .



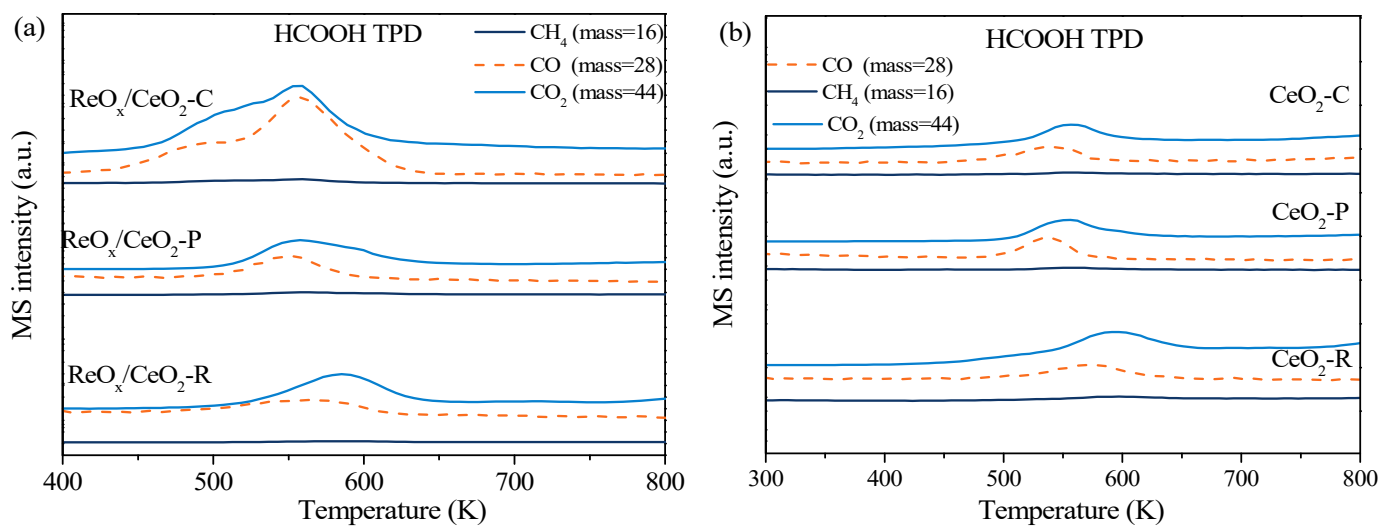

Fig. S11. TPD of HCOOH over (a)  $\text{ReO}_x/\text{CeO}_2$ -C,  $\text{ReO}_x/\text{CeO}_2$ -P and  $\text{ReO}_x/\text{CeO}_2$ -R, (b)  $\text{CeO}_2$ -C,  $\text{CeO}_2$ -P and  $\text{CeO}_2$ -R.

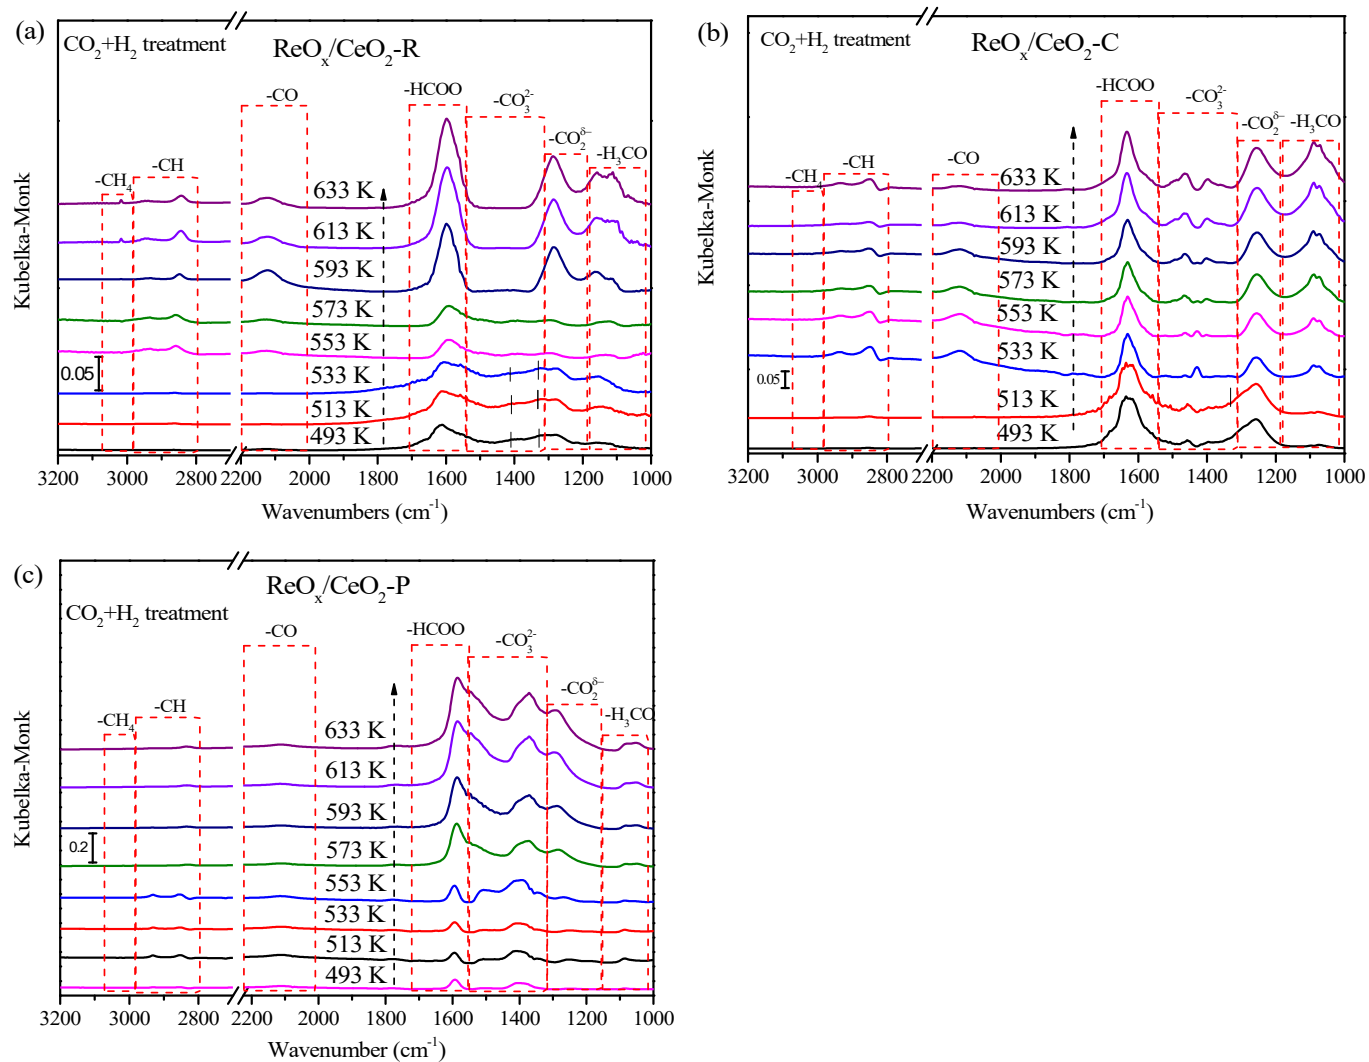

Fig. S12. Temperature-dependent infrared analysis of  $\text{CO}_2$  hydrogenation after exposing the catalysts to  $\text{CO}_2+\text{H}_2$  at 493 K and subsequently heating to 633 K. (a)  $\text{ReO}_x/\text{CeO}_2\text{-R}$ , (b)  $\text{ReO}_x/\text{CeO}_2\text{-C}$  and (c)  $\text{ReO}_x/\text{CeO}_2\text{-P}$ .

Table S1. Assessment of extraparticle mass transfer limitations in CO<sub>2</sub> hydrogenation over catalysts.

| Parameter                                                       | ReO <sub>x</sub> /CeO <sub>2</sub> -R |         |          | ReO <sub>x</sub> /CeO <sub>2</sub> -C. |         |          | ReO <sub>x</sub> /CeO <sub>2</sub> -P |         |          |
|-----------------------------------------------------------------|---------------------------------------|---------|----------|----------------------------------------|---------|----------|---------------------------------------|---------|----------|
| P(MPa)                                                          | 2                                     | 2       | 2        | 2                                      | 2       | 2        | 2                                     | 2       | 2        |
| T(K)                                                            | 613                                   | 613     | 613      | 613                                    | 613     | 613      | 613                                   | 613     | 613      |
| Particle size (μm)                                              | 25-45                                 | 25-45   | 25-45    | 25-45                                  | 25-45   | 25-45    | 25-45                                 | 25-45   | 25-45    |
| W <sub>cat</sub> (g)                                            | 0.05                                  | 0.1     | 0.2      | 0.05                                   | 0.1     | 0.2      | 0.05                                  | 0.1     | 0.2      |
| H <sub>2</sub> : CO <sub>2</sub> : Ar<br>(cm <sup>3</sup> /min) | 36:12:2                               | 72:24:4 | 144:48:8 | 36:12:2                                | 72:24:4 | 144:48:8 | 36:12:2                               | 72:24:4 | 144:48:8 |
| CO <sub>2</sub> (10 <sup>-5</sup> mol/g <sub>Re</sub> s)        | 14.95                                 | 15.60   | 15.82    | 1.94                                   | 1.90    | 2.01     | 1.25                                  | 1.31    | 1.41     |

Table S2. Assessment of intraparticle mass transfer limitations in CO<sub>2</sub> hydrogenation over catalysts.

| Parameter                                                                     | ReO <sub>x</sub> /CeO <sub>2</sub> -R |         |         | ReO <sub>x</sub> /CeO <sub>2</sub> -C. |         |         | ReO <sub>x</sub> /CeO <sub>2</sub> -P |         |         |
|-------------------------------------------------------------------------------|---------------------------------------|---------|---------|----------------------------------------|---------|---------|---------------------------------------|---------|---------|
| P(MPa)                                                                        | 2                                     | 2       | 2       | 2                                      | 2       | 2       | 2                                     | 2       | 2       |
| T(K)                                                                          | 613                                   | 613     | 613     | 613                                    | 613     | 613     | 613                                   | 613     | 613     |
| Particle size (μm)                                                            | ≤25                                   | 25-45   | 125-300 | ≤25                                    | 25-45   | 125-300 | ≤25                                   | 25-45   | 125-300 |
| W <sub>cat</sub> (g)                                                          | 0.1                                   | 0.1     | 0.1     | 0.1                                    | 0.1     | 0.1     | 0.1                                   | 0.1     | 0.1     |
| H <sub>2</sub> : CO <sub>2</sub> : Ar<br>(cm <sup>3</sup> min <sup>-1</sup> ) | 72:24:4                               | 72:24:4 | 72:24:4 | 72:24:4                                | 72:24:4 | 72:24:4 | 72:24:4                               | 72:24:4 | 72:24:4 |
| CO <sub>2</sub> (10 <sup>-5</sup> mol/g <sub>Re</sub> s)                      | 15.94                                 | 15.60   | 15.13   | 1.96                                   | 1.90    | 1.86    | 1.39                                  | 1.31    | 1.32    |

Table S3. Structural parameters of the samples

|                                       | Re (wt%)-XRF | Re (wt%)-XPS | S <sub>BET</sub> (m <sup>2</sup> /g) | Pore volume (cm <sup>3</sup> /g) |
|---------------------------------------|--------------|--------------|--------------------------------------|----------------------------------|
| ReO <sub>x</sub> /CeO <sub>2</sub> -R | 1.97         | 2.21         | 109.06                               | 0.32                             |
| ReO <sub>x</sub> /CeO <sub>2</sub> -C | 1.98         | 2.02         | 38.24                                | 0.16                             |
| ReO <sub>x</sub> /CeO <sub>2</sub> -P | 1.98         | 2.31         | 34.39                                | 0.19                             |

Table S4. (1) Infrared band assignments of the surface species on ReO<sub>x</sub>/CeO<sub>2</sub>-C.

| Surface species | Wavenumber (cm <sup>-1</sup> ) | assignment                                                |
|-----------------|--------------------------------|-----------------------------------------------------------|
| Carbonate       | 1398                           | v <sub>s</sub> (O-C-O)                                    |
|                 | 1512                           | v <sub>as</sub> (O-C-O)                                   |
| Carboxylate     | 1289                           | v <sub>s</sub> (O-C-O)                                    |
| CO bond         | 2007                           | linearly bound                                            |
|                 | 1892                           | bridge bound                                              |
| Formate         | 2948, 2853                     | v(CH)                                                     |
|                 | 1631                           | v <sub>as</sub> (O-C-O)                                   |
| Methoxyl        | 1096                           | v <sub>(CO)</sub> of terminal of bridged-OCH <sub>3</sub> |
| Methane         | 3019                           | v(CH)                                                     |

(2) Infrared band assignments of the surface species on ReO<sub>x</sub>/CeO<sub>2</sub>-R.

| Surface species | Wavenumber (cm <sup>-1</sup> ) | assignment                                                |
|-----------------|--------------------------------|-----------------------------------------------------------|
| Carboxylate     | 1289                           | v <sub>s</sub> (O-C-O)                                    |
| CO bond         | 2007, 1912                     | linearly bound                                            |
|                 | 1892                           | bridge bound                                              |
| Formate         | 2948, 2853                     | v(CH)                                                     |
|                 | 1594                           | v <sub>as</sub> (O-C-O)                                   |
| Methoxyl        | 1096, 1157                     | v <sub>(CO)</sub> of terminal of bridged-OCH <sub>3</sub> |
| Methane         | 3019                           | v(CH)                                                     |

(3) Infrared band assignments of the surface species on ReO<sub>x</sub>/CeO<sub>2</sub>-P.

| Surface species | Wavenumber (cm <sup>-1</sup> ) | assignment                                                |
|-----------------|--------------------------------|-----------------------------------------------------------|
| Carbonate       | 1398                           | v <sub>s</sub> (O-C-O)                                    |
|                 | 1512                           | v <sub>as</sub> (O-C-O)                                   |
| Carboxylate     | 1289                           | v <sub>s</sub> (O-C-O)                                    |
| CO bond         | 2007                           | linearly bound                                            |
|                 | 1892                           | bridge bound                                              |
| Formate         | 2948, 2853                     | v(CH)                                                     |
|                 | 1617, 1594                     | v <sub>as</sub> (O-C-O)                                   |
| Methoxyl        | 1096                           | v <sub>(CO)</sub> of terminal of bridged-OCH <sub>3</sub> |
| Methane         | 3019                           | v(CH)                                                     |
